# Supplementary material for: Taste Perception of Sweet, Sour, Salty, Bitter, and Umami and Changes Due to l-Arginine Supplementation, as a Function of Genetic Ability to Taste 6-n-Propylthiouracil
Source: MDPI journal article supplement (doi:10.3390/nu9060541), 2017-05-25
Supplement: s1 [file s1]

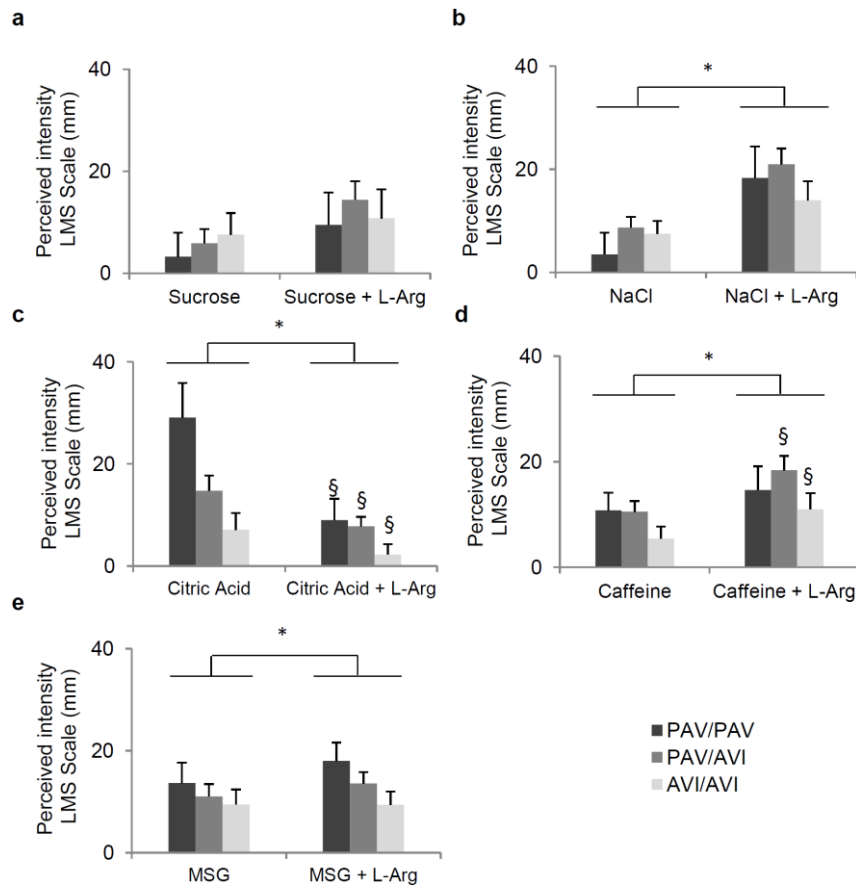

**Supplemental Figure 1.** Mean values ( $\pm$  SEM) of taste intensity evoked by stimulation with the sucrose (20 mmol/L), NaCl (20 mmol/L), citric acid (1.3 mmol/L), caffeine (1.5 mmol/L) and MSG (10 mmol/L) and those evoked by stimulation with the same solutions supplemented with L-Arg (1:1 molar ratio) according to *TAS2R38* genotypes. (a) Sucrose:  $N = 21$ . (b) NaCl:  $N = 37$ . (c) Citric Acid:  $N = 46$ . (d) Caffeine:  $N = 59$ . (e) MSG:  $N = 60$ . \*Significant difference ( $p < 0.037$ ; Fisher's LSD test, subsequent repeated-measures ANOVA). §Significant difference with respect to the corresponding value of each *TAS2R38* genotype in response to each stimulus without L-Arg supplementation ( $p < 0.027$ ; Fisher's LSD test, subsequent repeated measures ANOVA).

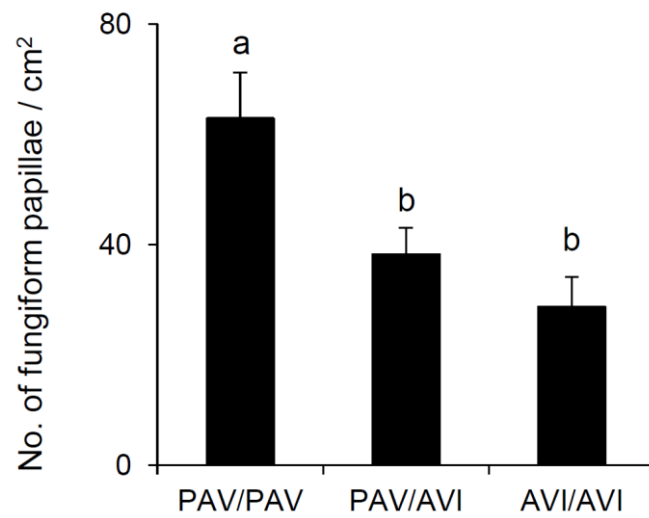

**Supplemental Figure 2.** Mean values  $\pm$  SEM of density of fungiform papillae ( $n/\text{cm}^2$ ) on the anterior part of the tongue in subjects with PAV/PAV genotype in *TAS2R38* locus ( $N = 9$ ), PAV/AVI genotype ( $N = 31$ ) and AVI/AVI genotype ( $N = 24$ ). Different letters indicate significant difference ( $p \leq 0.0091$ ; Fisher's LSD test; subsequent one-way ANOVA).
